# Supplementary material for: Quantitative Trait Loci Mapping for Bacterial Blight Resistance in Rice Using Bulked Segregant Analysis
Source: PubMed Central journal article supplement (PMC4139818; doi:10.3390/ijms150711847), 2014-07-03
Supplement: ijms-15-11847-s001.pdf [file ijms-15-11847-s001.pdf]

## Supplementary Information

**Table S1.** Molecular markers with polymorphism between the parents of ASH1 and IR24.

| Marker         | Chromosome | Position (Mb) | Type | Forward Primer (5'-3')    | Reverse Primer (5'-3')   |
|----------------|------------|---------------|------|---------------------------|--------------------------|
| <i>RM1282</i>  | 1          | 0.5           | SSR  | AAGCATGACAGCTGCAAGAC      | GGGGATGAAGGGTAATTTTCG    |
| <i>RM6515</i>  | 1          | 1.3           | SSR  | CTCGGCTAGTGACGATTTCTTGG   | ACGTCGTGGTAGGCGACATAGC   |
| <i>RM5302</i>  | 1          | 4.1           | SSR  | TATGGGTGACACATTGGGAC      | TTGTGACGTTTGAGAGCTGG     |
| <i>RM1</i>     | 1          | 4.6           | SSR  | GCGAAAACACAATGCAAAAA      | GCGTTGGTTGGACCTGAC       |
| <i>RM522</i>   | 1          | 5.2           | SSR  | ACCAGAGAAGCCCTCCTAGC      | GTTCTGTGGTGGTCACGTTG     |
| <i>RM490</i>   | 1          | 6.6           | SSR  | ATCTGCACACTGCAAACACC      | AGCAAGCAGTGCTTTCAGAG     |
| <i>R01D56</i>  | 1          | 10.6          | STS  | ATTCCTGGTTCTACATTACTTA    | CGCCTCACTAGAATATCGGA     |
| <i>RM1287</i>  | 1          | 10.8          | SSR  | CCATTTGCAGTATGAACCATGC    | ATCATGCAATAGCCGGTAGAGG   |
| <i>RM3412</i>  | 1          | 11.6          | SSR  | TGATGGATCTCTGAGGTGTAAGAGC | TGCACTAATCTTTCTGCCACAGC  |
| <i>R01D73</i>  | 1          | 16.2          | STS  | CTTCCTTGCTGGAGAGCTG       | TTATGATGGTGCCTCCCATT     |
| <i>R01D95</i>  | 1          | 23.2          | STS  | GTAAAGCATGCGTGACACC       | TTAATAAGAGGCAACGGAAC     |
| <i>RM1349</i>  | 1          | 25.0          | SSR  | ATCCACCTGCTGATCAGCTC      | CGAGAAGCTCAAGGTGAACC     |
| <i>RM5461</i>  | 1          | 26.9          | SSR  | GTGGAGGAGCGAAGGGAACACG    | CCTCCCATATAAACCGGCGAACC  |
| <i>R01D124</i> | 1          | 31.7          | STS  | ATAGTTCGCCATCGTCAT        | ACACGCCATAGCAAGGAA       |
| <i>RM128</i>   | 1          | 32.5          | SSR  | AGCTTGGGTGATTTCTTGGAAGCG  | ACGACGAGGAGTCGCCGTGCAG   |
| <i>R01D144</i> | 1          | 38.5          | STS  | AATAGAATTACTGATGAAACCTTA  | GCCCGTTACCGCTTATGT       |
| <i>RM1361</i>  | 1          | 40.8          | SSR  | ATGCTTGACAGACAATCGATGC    | CTCTCCGCCTAAACAACCTTGTGC |
| <i>RM5310</i>  | 1          | 41.2          | SSR  | GGGACCAAGACCTTTCCAATGC    | GCGGAAGCAGGAGAATCGTAGC   |
| <i>R01D182</i> | 1          | 42.9          | STS  | GTAATTGAATTTCACTGCTGCT    | ACGTACGTGACGTGCTTATG     |
| <i>RM154</i>   | 2          | 1.0           | SSR  | ACCCTCTCCGCCTCGCCTCCTC    | CTCCTCCTCCTGCGACCGCTCC   |
| <i>R02D10</i>  | 2          | 2.6           | STS  | GCACATCGGTAACGGTAGAGG     | CGGTGGATAAAGACAAAGAGG    |
| <i>R02D23</i>  | 2          | 4.6           | STS  | ACCAAGATCCTGGAGGCATT      | TCCAACATGGCCACAGATTA     |
| <i>R02D37</i>  | 2          | 6.4           | STS  | CCCAGTCTGCTGCCATCT        | GAATGTATTTTCAGTTCCAGTAAG |
| <i>RM5699</i>  | 2          | 9.0           | SSR  | TATTGGTATGTGTGGGATCG      | CTGGTGTACCTATATGGATTGC   |
| <i>RM521</i>   | 2          | 10.8          | SSR  | TTCCCTTATTCCTGCTCTCC      | GGGATTTGCAGTGAGCTAGC     |
| <i>RM290</i>   | 2          | 10.8          | SSR  | ACCCTTATTCCTGCTCTCCTC     | GTGCTGTAGATGGAAGGGAG     |
| <i>R02D55</i>  | 2          | 15.2          | STS  | GCAGCAAAGTGCGGAGTA        | CAGGTGAATTGCCAATT        |

Table S1. *Cont.*

| Marker         | Chromosome | Position (Mb) | Type | Forward Primer (5'-3')     | Reverse Primer (5'-3')    |
|----------------|------------|---------------|------|----------------------------|---------------------------|
| <i>R02D75</i>  | 2          | 19.7          | STS  | CCACATCCTCATCTCTGTCA       | CGACAGGTCAGCTTCAGGT       |
| <i>RM3688</i>  | 2          | 22.4          | SSR  | GTTGAATCAAGCTGTGCAGC       | AGCTAGGCAAAGCATGCATG      |
| <i>RM6617</i>  | 2          | 24.8          | SSR  | CTCCTCCTCCCACCTCTACTCC     | TAATAGATGGCGATGGACGAAGG   |
| <i>RM6465</i>  | 2          | 28.4          | SSR  | CCTAGGTTCCCATCGCAACTGACC   | TCCCCGAGGAGGGAGACGAAGG    |
| <i>R02D129</i> | 2          | 30.3          | STS  | CCTGAAGGAAATGATAGCAATAG    | GTTTTGTATGCTCTTCACTTGTC   |
| <i>RM240</i>   | 2          | 31.5          | SSR  | CCTTAATGGGTAGTGTGCAC       | TGTAACCATTCCCTTCCATCC     |
| <i>RM425</i>   | 2          | 32.3          | SSR  | ACCACAGCAGGTGGAACAGG       | GCTAGCTAAGCCAACACCAACG    |
| <i>R02D144</i> | 2          | 33.5          | STS  | AGTCCACACGCCATCGTC         | TCGCAGAACTCCAAACACAC      |
| <i>RM166</i>   | 2          | 34.3          | SSR  | GGTCCTGGGTCAATAATTGGGTTACC | TTGCTGCATGATCCTAAACCGG    |
| <i>RM48</i>    | 2          | 35.5          | SSR  | TGTCCCACTGCTTCAAGC         | CGAGAATGAGGGACAAATAACC    |
| <i>RM6349</i>  | 3          | 0.8           | SSR  | ATGATGCCTCATGTCTCTGATCTCC  | AGATGAACACGACCGATAGGATAGG |
| <i>RM569</i>   | 3          | 1.9           | SSR  | CTGCGTCAGATTTCTCCTCTTCG    | ACATTCTCGCTTGCTCCTCTCG    |
| <i>RM6038</i>  | 3          | 4.8           | SSR  | CCGTCGTGTCGTA CTGGTAGTCC   | TCCACAGCCTACCTAGCTTCTCC   |
| <i>RM1022</i>  | 3          | 7.2           | SSR  | GTCTTTGATAGCGGCTTTGTCC     | GGATGAGGGAGTAATGTCTCTTGG  |
| <i>RM232</i>   | 3          | 9.7           | SSR  | CCGGTATCCTTCGATATTGC       | CCGACTTTTCCTCCTGACG       |
| <i>RM5955</i>  | 3          | 11.2          | SSR  | TCGCCGTAGGGCCAGTAGAAGC     | CATCCACAACCTCCTGCAGTTCC   |
| <i>RM282</i>   | 3          | 12.4          | SSR  | CTGTGTCGAAAGGCTGCAC        | CAGTCCTGTGTTGCAGCAAG      |
| <i>RM6929</i>  | 3          | 12.9          | SSR  | TTCTTTCGAGGGTACGTAGAGG     | CTAGCTAGCCAGTAGCTGATCG    |
| <i>RM1164</i>  | 3          | 14.7          | SSR  | TTTCTGGCGACGTGATTTGTGC     | CAATTCGGAAGAGCAAACATGACC  |
| <i>R03D86</i>  | 3          | 19.7          | STS  | AGGCTAAGTGAAGAAATAATAAG    | CTCCGTATTCACTACTGGTTG     |
| <i>RM16</i>    | 3          | 22.9          | SSR  | CGCTAGGGCAGCATCTAAA        | AACACAGCAGGTACGCGC        |
| <i>RM6266</i>  | 3          | 23.6          | SSR  | CACCTTCTTGAGAAGCTCCTTCG    | GACATCGAGAGCGAGGACAGC     |
| <i>R03D110</i> | 3          | 26.3          | STS  | GCATTGAATTGTACTCTTATTATAT  | ACGAATCAAAAGGAGACTAAAAT   |
| <i>R03D120</i> | 3          | 27.4          | STS  | TGGCACAAATCATTATGATC       | GATTGCAATGCAGCATATAG      |
| <i>RM532</i>   | 3          | 28.1          | SSR  | TCTATAATGTAGCCCCCCCC       | TTTCAGGGGCTTCTACCAAC      |
| <i>R03D143</i> | 3          | 32.8          | STS  | AGGAGAAGCTCGCCATGAT        | CATGAACTGCAACATCACCAG     |
| <i>R03D146</i> | 3          | 33.5          | STS  | AACTGGCTACGGCAAAG          | TTTGTTCGGAATAATGATGC      |
| <i>RM143</i>   | 3          | 34.1          | SSR  | GTCCCGAACCTAGCCCGAGGG      | AGAGGCCCTCCACATGGCGACC    |

Table S1. *Cont.*

| Marker         | Chromosome | Position (Mb) | Type | Forward Primer (5'-3')     | Reverse Primer (5'-3')     |
|----------------|------------|---------------|------|----------------------------|----------------------------|
| <i>R03D158</i> | 3          | 36.2          | STS  | CTGCAGGGACACCGAGAT         | CCACAGCGACATCCTGTACC       |
| <i>R03D159</i> | 3          | 36.3          | STS  | CGACGGCAGATACGATACAC       | CACCGCTGTTCAAAGTTTGTC      |
| <i>RM85</i>    | 3          | 37.2          | SSR  | CCAAAGATGAAACCTGGATTG      | GCACAAGGTGAGCAGTCC         |
| <i>RM7585</i>  | 4          | 0.2           | SSR  | TGCAATCGCGTAGTTGGTAGAATAGG | CTCGACTACCTCGCCATCATCC     |
| <i>RM3216</i>  | 4          | 1.1           | SSR  | AAGTCCGGTGACTCAGTAATCACG   | GCTATATCCGGGCTCTTTCTTGC    |
| <i>RM261</i>   | 4          | 6.5           | SSR  | CTACTTCTCCCCTTGTGTCG       | TGTACCATCGCCAAATCTCC       |
| <i>R04D20</i>  | 4          | 11.6          | STS  | AGTGCTCGGTTTTGTTTTC        | GTCAGATATAATTGATGGATGTA    |
| <i>R04D35</i>  | 4          | 18.1          | STS  | GCTTCTCCTGGTTGTATGC        | AAAATAGGGAGGCAGATAGAC      |
| <i>R04D76</i>  | 4          | 24.6          | STS  | CTTGAACCTGAGTGAGTGG        | CGATGAAAATGATGTCTA         |
| <i>RM3288</i>  | 4          | 27.5          | SSR  | CAATCTGGAGGCACTGTCACG      | AGTGACAAGATGAAGCCAACAGC    |
| <i>R04D95</i>  | 4          | 29.0          | STS  | TTTTGTGAACTTGACCCTC        | GCGTCCATGTCTTTATTGTG       |
| <i>RM3217</i>  | 4          | 30.3          | SSR  | GACCTAACCAATCGGACGAACG     | CACTAGTGCTCTGTCTCTGCTTACCC |
| <i>RM348</i>   | 4          | 32.9          | SSR  | CATGAAGCTGTGTTGCTGTTGC     | CGCTACTAATAGCAGAGAGACCATCG |
| <i>R04D123</i> | 4          | 34.0          | STS  | GAAGATTTTGC GTGTTGCTG      | TCCGATAGCCCATCTGTACC       |
| <i>RM122</i>   | 5          | 0.3           | SSR  | GAGTCGATGTAATGTCATCAGTGC   | GAAGGAGGTATCGCTTTGTTGGAC   |
| <i>RM413</i>   | 5          | 2.2           | SSR  | CCAATCTTGTCTTCCGGATCTTGC   | AGATAGCCATGGGCGATTCTTGG    |
| <i>R05D22</i>  | 5          | 2.6           | STS  | GGGGTCGATTTCAAGTGGA        | GGAAGATGAAGACGGTGGTG       |
| <i>RM5874</i>  | 5          | 3.5           | SSR  | GAAATCCCATTTCGTTGCTGATGG   | CACTCAGCATCATCGCCAGAGC     |
| <i>R05D41</i>  | 5          | 5.9           | STS  | GAGAAAGAGTGGAAGGAG         | AGTATCGTCAGGAGGGTC         |
| <i>RM5994</i>  | 5          | 6.8           | SSR  | ATCAGGCACTGCAGCATGTGC      | TTGAACAACCTCGTCACCCTCATCG  |
| <i>RM289</i>   | 5          | 7.8           | SSR  | TCCATGGCACACAAGCC          | CTGTGCACGAACTTCCAAAG       |
| <i>R05D55</i>  | 5          | 13.9          | STS  | CTCGCTGTTTACTGACTGG        | TTTGATGTACTGCCTGCTCT       |
| <i>RM6645</i>  | 5          | 14.9          | SSR  | CTCCGGGATGCCATAGTTTCG      | AAGCTTCTCTCGATCGTCTTCG     |
| <i>RM430</i>   | 5          | 18.6          | SSR  | GTCCCTGATCAGAAACGAGATGG    | TAGGGTTGGAAGAATGCAAGACC    |
| <i>R05D87</i>  | 5          | 21.5          | STS  | CTCAATTTACCCATCCC          | CGCTCCGTCTCCAACCTC         |
| <i>RM5642</i>  | 5          | 22.1          | SSR  | AAAAACCGGCTAATCCCTCC       | TTCGATGGGATTGATCGC         |
| <i>RM3870</i>  | 5          | 22.8          | SSR  | GGAGTAGATGTAAGCCAAAGGATGC  | CATGTCTGAGTATGACGGAGTATTGC |
| <i>RM3476</i>  | 5          | 24.0          | SSR  | TGATAGTTGACAATGCAGGAGAGG   | TCGATCCGGAAGTTATTTCTGC     |

Table S1. *Cont.*

| Marker        | Chromosome | Position (Mb) | Type | Forward Primer (5'-3')    | Reverse Primer (5'-3')     |
|---------------|------------|---------------|------|---------------------------|----------------------------|
| <i>RM7081</i> | 5          | 24.7          | SSR  | CTTCCCGCACTACACTGCACTCC   | CTGCAACTTGCTCATGGAGTTGG    |
| <i>RM3348</i> | 5          | 25.2          | SSR  | CTTCTCGGTTTCATCCAAAGAGC   | GTGGAAGCTATGGGTAGCTCACG    |
| <i>RM6972</i> | 5          | 25.5          | SSR  | CATGGTGCTCCTACTGGTTGTACC  | CCCATCCATAATCACAACCTCAGC   |
| <i>RM3321</i> | 5          | 25.9          | SSR  | CTATAAATAGGGCCAGGTGGTAGGC | CTGCCTAGCCATAGCCAAACG      |
| <i>RM3616</i> | 5          | 26.4          | SSR  | ACACCAGCGACGATCGATTCC     | CTGCGTGAGACGGTTGACTGACC    |
| <i>RM6360</i> | 5          | 28.3          | SSR  | ACGTGGAATCCAAATTGACAGC    | TTCGCTGCACTGTTTACTCTTGG    |
| <i>RM334</i>  | 5          | 28.6          | SSR  | GTTCAAGTGTTCAGTGCCACC     | GACTTTGATCTTTGGTGGACG      |
| <i>RM170</i>  | 6          | 1.3           | SSR  | TCGCGCTTCTTCCTCGTCGACG    | CCCGCTTGCGAGGAAGCAGCC      |
| <i>RM510</i>  | 6          | 2.8           | SSR  | AACCGGATTAGTTTCTCGCC      | TGAGGACGACGAGCAGATTC       |
| <i>RM3805</i> | 6          | 2.9           | SSR  | ACACCACCATCAACGTACCAACC   | AAGTCGAGAGGAAGAAGCCAAGG    |
| <i>RM585</i>  | 6          | 3.1           | SSR  | CAGTCTTGCTCCGTTTGTG       | CTGTGACTGACTTGGTCATAGG     |
| <i>RM6773</i> | 6          | 4.4           | SSR  | GCTGCTCCACCTTCACCTTCC     | CGATGGTGTGTTGTTTGGTTGC     |
| <i>RM50</i>   | 6          | 6.3           | SSR  | ACTGTACCGGTCGAAGACG       | AAATTCCACGTCAGCCTCC        |
| <i>RM539</i>  | 6          | 8.1           | SSR  | GAGCGTCCTTGTTAAAACCG      | AGTAGGGTATCACGCATCCG       |
| <i>R06D51</i> | 6          | 8.1           | STS  | GGCAACCGACCATCACTTAG      | CCCCACTGGTCAAATGAGTT       |
| <i>RM3183</i> | 6          | 12.3          | SSR  | GTGGTGCTAGTATGGACGAGAGG   | CGGTTGGTAGACTGTAAACAAAGTGC |
| <i>RM1340</i> | 6          | 23.0          | SSR  | ATCGATCTCCACCCTTCTTCC     | CCCTACTCCCAGTAACCCAAATAGG  |
| <i>RM7434</i> | 6          | 23.6          | SSR  | AGGCTTCTTGAATGGAAGTGC     | GGAATATACGTGGATGTGAGAGG    |
| <i>RM162</i>  | 6          | 24.0          | SSR  | GCCAGCAAACAGGGATCCGG      | CAAGGTCTTGTGCGGCTTGC       |
| <i>RM6395</i> | 6          | 25.6          | SSR  | GGCTTCGGCTTCTGAAGTAGC     | CGACTAAGCAGCAGTAACAATCTCG  |
| <i>RM1370</i> | 6          | 28.1          | SSR  | AAACGAGAACCAACCGACAC      | GGAGGGAGGAATGGGTACAC       |
| <i>RM340</i>  | 6          | 28.2          | SSR  | GGTAAATGGACAATCCTATGGC    | GACAAATATAAGGGCAGTGTGC     |
| <i>RM439</i>  | 6          | 29.1          | SSR  | CTGGGTCTAATCTCGTCTAAATTGC | CGCCTCTCATAACAGTCCACTCC    |
| <i>RM5814</i> | 6          | 29.4          | SSR  | GATCTCCACCACCTCCATCTCC    | CCTACATCAAGGCTCGCTACTGC    |
| <i>RM5344</i> | 7          | 1.9           | SSR  | ATGACCTTCCTCGCAAGAGTGC    | ACACAAGGCTCTCAACCAAGACG    |
| <i>RM427</i>  | 7          | 2.7           | SSR  | TTGAGCTGATGAGAGTTGGTTGC   | CTGTCACTAGCTCTGCCCTGACC    |
| <i>R07D25</i> | 7          | 3.1           | STS  | CCTGGGACCTTGTACCCTCT      | TGACACCATCAGAAAAGTCT       |
| <i>R07D44</i> | 7          | 6.7           | STS  | ACCTTCCCTCCCCTTTTGTAT     | AACTTGGTCTTCTGTTTATTG      |

Table S1. *Cont.*

| Marker         | Chromosome | Position (Mb) | Type | Forward Primer (5'-3')   | Reverse Primer (5'-3')    |
|----------------|------------|---------------|------|--------------------------|---------------------------|
| <i>RM3755</i>  | 7          | 14.7          | SSR  | TGTGGACAACCTCAACTGAAAGC  | CATAATCACCAACATCGGAGAAGC  |
| <i>R07D68</i>  | 7          | 19.4          | STS  | ATGTCGCCTACGAGTTTTTC     | TTCATGTGACCATTTGTGC       |
| <i>R07D82</i>  | 7          | 23.6          | STS  | CAGCCCTAAATCTAAATACCC    | ACGTTGAGACAGGCGAGC        |
| <i>R07D99</i>  | 7          | 26.4          | STS  | CCGGTGACTTCTTCATGTCC     | GCACACTCATCGGTGCATAC      |
| <i>R07D100</i> | 7          | 26.7          | STS  | TGTTTTTGTGTGCTCCAGTG     | GGGAGAACCCTTCCCCTGAT      |
| <i>RM172</i>   | 7          | 29.5          | SSR  | TGCAGCTGCGCCACAGCCATAG   | CAACCACGACACCGCCGTGTTG    |
| <i>RM3710</i>  | 8          | 0.4           | SSR  | AGCAGCAGCCGCTTCTTGTCG    | CGATTGTTTCCTCCGCCATTCC    |
| <i>RM6393</i>  | 8          | 0.6           | SSR  | TCTGGATGTAGTCGATGCTGAGG  | AGAAGAGAGCAGCGTGACATGG    |
| <i>RM152</i>   | 8          | 0.6           | SSR  | GAAACCACCACACCTCACCG     | CCGTAGACCTTCTTGAAGTAG     |
| <i>R08D17</i>  | 8          | 2.1           | STS  | TCTGGACTGGAAATAGCATGG    | GTGTGAAAGCCCATCTGTCA      |
| <i>RM1376</i>  | 8          | 3.2           | SSR  | ATGCATGTGTGATGACTGACAGG  | GGTACTCTTGCCAAATGGTCTCC   |
| <i>RM3572</i>  | 8          | 3.9           | SSR  | CCATTTGGTAGGTCCATCTTACCC | CTCCCAAGTGAAGTGCTGTCTGG   |
| <i>RM3181</i>  | 8          | 7.5           | SSR  | TTTAGCGAAGCAAACCCTCACCC  | CGAGCCAAGAAGAATGAATCAGC   |
| <i>RM8271</i>  | 8          | 7.6           | SSR  | AGCAGCTCCGATTGTGTTAGCC   | AATGGCGTCTGTGGTACTTTGC    |
| <i>R08D50</i>  | 8          | 8.8           | STS  | GGAGGAGGAGGAGAGATGGT     | GCAGCAGAACATGAGTTTGG      |
| <i>R08D54</i>  | 8          | 13.4          | STS  | CCTATTCACTCTACCGACAT     | GTTTAGTTCCCATTTGCTTT      |
| <i>RM223</i>   | 8          | 20.6          | SSR  | GAGTGAGCTTGGGCTGAAAC     | GAAGGCAAGTCTTGGCACTG      |
| <i>R08D77</i>  | 8          | 20.7          | STS  | CGAAAGAGGAGAGGGGTAGT     | CGAAAACGAGAAACAAATA       |
| <i>RM284</i>   | 8          | 21.1          | SSR  | ACTGCATGATCCTCCTCAGATCC  | CCCTCTGATCTCTGATACTCCATCC |
| <i>RM3262</i>  | 8          | 22.4          | SSR  | CTGGAGATGCAGATCCTCAACC   | TAGTACAACATGGGAGCCTGTGC   |
| <i>RM6976</i>  | 8          | 23.6          | SSR  | CTGCAACCTGCACGAGTACACC   | GTCCCATTGGATAGAATCCCAGAGC |
| <i>RM230</i>   | 8          | 25.8          | SSR  | GCCAGACCGTGGATGTTC       | CACCGCAGTCACTTTTCAAG      |
| <i>RM7400</i>  | 8          | 27.9          | SSR  | TTTGATTTGTGCAGGGATACGC   | CTGCAGCAGAAACACGAAGAGG    |
| <i>RM264</i>   | 8          | 27.9          | SSR  | GTTGCGTCCTACTGCTACTTC    | GATCCGTGTCGATGATTAGC      |
| <i>RM316</i>   | 9          | 1.0           | SSR  | CTAGTTGGGCATACGATGGC     | ACGCTTATATGTTACGTCAAC     |
| <i>R09D28</i>  | 9          | 9.4           | STS  | ACTGCTTTGATGGCTTGTG      | CTCCCCAAACTGAATCC         |
| <i>RM105</i>   | 9          | 12.5          | SSR  | GTCGTCGACCCATCGGAGCCAC   | TGGTCGAGGTGGGGATCGGGTC    |
| <i>R09D51</i>  | 9          | 14.7          | STS  | CTCACCTACCTAAAACCCAAC    | CCACCCAAATCTGATACTG       |

Table S1. *Cont.*

| Marker        | Chromosome | Position (Mb) | Type | Forward Primer (5'-3')   | Reverse Primer (5'-3')     |
|---------------|------------|---------------|------|--------------------------|----------------------------|
| <i>RM3700</i> | 9          | 15.4          | SSR  | CCTTTGCCGCCTTCTCTTGG     | ACGAGTTCCCGGTTAACCTTACG    |
| <i>RM257</i>  | 9          | 17.7          | SSR  | CCGTGCAACTTAAATCCAAACAGG | GGAATCCTATATGAGCCAGTGATGG  |
| <i>R09D75</i> | 9          | 19.2          | STS  | CTATAAGACCAAAACGAAAACCT  | GAAAACCATTGTGTCACTGTA      |
| <i>RM107</i>  | 9          | 19.8          | SSR  | TCTTACTGCGTCTCTGGGTTCC   | ATTCTTGCGGCGATTCATCTTCC    |
| <i>RM215</i>  | 9          | 20.9          | SSR  | GAGCAGCAAGAGCAGCAGAGG    | CATGCTCGACTTCAGAAGCTTGG    |
| <i>R09D92</i> | 9          | 22.5          | STS  | GACAGAGAACTGGGCGTTC      | CTGTAAACCCCCACAAAGC        |
| <i>RM205</i>  | 9          | 22.7          | SSR  | CTGGTTCTGTATGGGAGCAG     | CTGGCCCTTCACGTTTCAGTG      |
| <i>RM6370</i> | 10         | 0.3           | SSR  | TTGACAAGCCACACACACAG     | GTCCTCCCTTGGTTCCTTCC       |
| <i>R10D16</i> | 10         | 8.4           | STS  | AATGCCACATCTTCCTTCAA     | CAGGACAGAGGAGAGGGAGA       |
| <i>RM239</i>  | 10         | 9.7           | SSR  | TACAAAATGCTGGGTACCCC     | ACATATGGGACCCACCTGTC       |
| <i>R10D38</i> | 10         | 16.0          | STS  | TAAGACCTTTGCCTGCTGGT     | GAGCAGATTTTTCCACTGC        |
| <i>R10D45</i> | 10         | 17.4          | STS  | CAAGCCTGGATCACCATCTC     | CTCCACAGCGGTAAGTGTTG       |
| <i>R10D57</i> | 10         | 19.4          | STS  | GTCCCTAGGCCATCTCTTG      | GCGAATAGGGGTGGACAG         |
| <i>R10D61</i> | 10         | 20.3          | STS  | TGGGGAAGTGTGAAGATGA      | ATCGTGGCAAAGCAATACT        |
| <i>RM1374</i> | 10         | 21.6          | SSR  | TAGATATGTTGGGCCGGAAG     | AGATCGATGCCGTTTCAGAC       |
| <i>RM591</i>  | 10         | 22.5          | SSR  | CTAGCTAGCTGGCACCAGTG     | TGGAGTCCGTGTTGTAGTCG       |
| <i>RM6824</i> | 10         | 23.1          | SSR  | GAGAGAACCTGGTGGTGGAG     | AGTGGTAGAAGATCCGAGATCG     |
| <i>RM6395</i> | 10         | 25.6          | SSR  | GGCTTCGGCTTCTGAACTAGC    | CGACTAAGCAGCAGTAACAATCTCG  |
| <i>RM7557</i> | 11         | 2.3           | SSR  | CCTCCAGGTGAAGTGCCTTTGC   | CTTCATCTTCCCTGCTGCCTTTGC   |
| <i>RM1124</i> | 11         | 3.8           | SSR  | CTAGGGATCGGTAGACCCAATCG  | TGGTGATGGCACTTTAGACAGAAGG  |
| <i>R11D24</i> | 11         | 4.3           | STS  | TTCGGCATCTACCATGACTG     | CTTGATCTCGTCCACCGTCT       |
| <i>RM120</i>  | 11         | 5.7           | SSR  | CACACAAGCCCTGTCTCACGACC  | CGCTGCGTCATGAGTATGTA       |
| <i>RM3701</i> | 11         | 8.0           | SSR  | GAAAGAGGAGGAAGAGCTAGAGG  | CCATATGTACGGAGTGTGTTTACC   |
| <i>R11D45</i> | 11         | 8.1           | STS  | AGTTTTGACTGATAGCCGATTG   | GAGAAGAAAGAGGAGGAAGAGC     |
| <i>RM3428</i> | 11         | 13.4          | SSR  | GCCATTGACACCAAATGATCACC  | GGCATATAAGGTCCATGGTGAATTGG |
| <i>RM6272</i> | 11         | 16.4          | SSR  | ATCTACTCCGCCACCACCACAGC  | CTCTACCTCTCCCTCTCGCCTTCC   |
| <i>RM287</i>  | 11         | 16.6          | SSR  | TTCCTGTAAAGAGAGAAATC     | GTGTATTTGGTGAAGCAAC        |
| <i>RM5349</i> | 11         | 19.0          | SSR  | CATCCAAATGTTGCGGATTACC   | TTCAATAGCCCAGAGAACCAAGC    |

Table S1. *Cont.*

| Marker         | Chromosome | Position (Mb) | Type | Forward Primer (5'-3')     | Reverse Primer (5'-3')   |
|----------------|------------|---------------|------|----------------------------|--------------------------|
| <i>R11D80</i>  | 11         | 19.9          | STS  | AGGAGATACAGGGCCAGGTT       | CCCTTCAGGATCAAATGGAG     |
| <i>RM254</i>   | 11         | 24.2          | SSR  | AGCCCCGAATAAATCCACCT       | CTGGAGGAGCATTTGGTAGC     |
| <i>RM7170</i>  | 11         | 24.4          | SSR  | GCGACTTGAGAGCGTTTGTAGG     | AGCCAACGTAGCACGAACTGC    |
| <i>R11D100</i> | 11         | 24.8          | STS  | AAGAAAAATATCTATTGAGGAGTG   | GGAGGACCATAAATGACGG      |
| <i>R11D110</i> | 11         | 26.5          | STS  | GCGGAAAAGCAAGAGGAAT        | GCCCATGAGAGAAGTAAAGGAA   |
| <i>RM2064</i>  | 11         | 26.6          | SSR  | TTGATGTTGTGGGCTTCTCTACC    | TCCAATCACGCGTATTACATGC   |
| <i>RM4A</i>    | 12         | 0.9           | SSR  | TTGACGAGGTCAGCACTGAC       | AGGGTGTATCCGACTCATCG     |
| <i>RM8216</i>  | 12         | 1.4           | SSR  | AGTTGATTATCCATCATGTGC      | TGTAGGCCCTATGAATCTCC     |
| <i>RM6296</i>  | 12         | 3.2           | SSR  | TTAAGCCCACGTTTCTCTTGTCC    | CTCGCTAGGGTTAGGGTTTCAGG  |
| <i>RM7619</i>  | 12         | 4.8           | SSR  | TCTTGGTATGTATTGGCAGCGAAAGC | AGGATGTGAATGAAGGCCGAATGG |
| <i>RM7003</i>  | 12         | 6.8           | SSR  | CTCTAGCTCTCTCATGGATGG      | AATCATAGGGCAGACATACAGC   |
| <i>R12D51</i>  | 12         | 11.4          | STS  | CCTAACAGCGGCATCTCCT        | AGTGCATTCACCCAAAAATTG    |
| <i>RM277</i>   | 12         | 18.3          | SSR  | CGGTCAAATCATCACCTGAC       | CAAGGCTTGCAAGGGAAG       |
| <i>RM1246</i>  | 12         | 19.2          | SSR  | GGCTCACCTCGTTCTCGATCC      | CATAAATAAATAGGGCGCCACACC |
| <i>R12D70</i>  | 12         | 19.8          | STS  | TTGATGATAGTATTTGCTGATG     | AGATAGTGTCGGCGGTGG       |
| <i>RM6947</i>  | 12         | 24.0          | SSR  | GGCTGCTGGTATGTATTCAAGTGC   | GCAAGTGAGAAACAGAAGTGATCG |
| <i>R12D103</i> | 12         | 26.0          | STS  | CCGCCGAGAAGAAACAAAG        | CCCAAGAACAGGATTACA       |
| <i>RM7558</i>  | 12         | 27.0          | SSR  | CAGTAGCAGGCTCCCTTTTG       | ATCAGGAACACCAGAGACGG     |
| <i>RM1227</i>  | 12         | 27.4          | SSR  | CATCGACATGTGGACCACTCC      | GCCTGAGACAAGTCCATGGTAGC  |

**Table S2.** Linkage markers to BB resistance

| <b>Marker</b>  | <b>Chromosome</b> | <b>Position (Mb)</b> | <b>Type</b> | <b>Forward Primer (5'-3')</b> | <b>Reverse Primer (5'-3')</b> |
|----------------|-------------------|----------------------|-------------|-------------------------------|-------------------------------|
| <i>R01D124</i> | 1                 | 31.7                 | STS         | ATAGTTCGCCATCGTCAT            | ACACGCCATAGCAAGGAA            |
| <i>RM128</i>   | 1                 | 32.5                 | SSR         | AGCTTGGGTGATTTCTTGGAAGCG      | ACGACGAGGAGTCGCCGTGCAG        |
| <i>R01D144</i> | 1                 | 38.5                 | STS         | AATAGAATTACTGATGAAACCTTA      | GCCCGTTACCGCTTATGT            |
| <i>RM1361</i>  | 1                 | 40.8                 | SSR         | ATGCTTGCAGACAATCGATGC         | CTCTCCGCCTAAACAACCTTGTGC      |
| <i>R03D143</i> | 3                 | 32.8                 | STS         | AGGAGAAGCTCGCCATGAT           | CATGAACTGCAACATCACCAG         |
| <i>R03D146</i> | 3                 | 33.5                 | STS         | ACACTGGCTACGGCAAAG            | TTTGTTTCGGGAATAATGATGC        |
| <i>RM143</i>   | 3                 | 34.1                 | SSR         | GTCCCGAACCTAGCCCGAGGG         | AGAGGCCCTCCACATGGCGACC        |
| <i>R03D158</i> | 3                 | 36.2                 | STS         | CTGCAGGGACACCGAGAT            | CCACAGCGACATCCTGTACC          |
| <i>R03D159</i> | 3                 | 36.3                 | STS         | CGACGGCAGATACGATACAC          | CACCGCTGTTCAAAGTTTGTC         |
| <i>RM85</i>    | 3                 | 37.2                 | SSR         | CCAAAGATGAAACCTGGATTG         | GCACAAGGTGAGCAGTCC            |
| <i>RM3476</i>  | 5                 | 24.0                 | SSR         | TGATAGTTGACAATGCAGGAGAGG      | TCGATCCGGAAGTTATTTCTGC        |
| <i>RM7081</i>  | 5                 | 24.7                 | SSR         | CTTCCCGCACTACACTGCACTCC       | CTGCAACTTGCTCATGGAGTTGG       |
| <i>RM3348</i>  | 5                 | 25.2                 | SSR         | CTTCTCGGTTTCATCCAAAGAGC       | GTGGAAGCTATGGGTAGCTCACG       |
| <i>RM6972</i>  | 5                 | 25.5                 | SSR         | CATGGTGCTCCTACTGGTTGTACC      | CCCATCCATAATCACAACCTCAGC      |
| <i>RM3321</i>  | 5                 | 25.9                 | SSR         | CTATAAATAGGGCCAGGTGGTAGGC     | CTGCCTAGCCATAGCCAAACG         |
| <i>RM3616</i>  | 5                 | 26.4                 | SSR         | ACACCAGCGACGATCGATTCC         | CTGCGTGAGACGGTTGACTGACC       |
| <i>RM6360</i>  | 5                 | 28.3                 | SSR         | ACGTGGAATCCAAATTGACAGC        | TTCGCTGCACTGTTTACTCTTGG       |
